# Supplementary material for: Identification of tumor antigens and immune subtypes in lower grade gliomas for mRNA vaccine development
Source: Springer Nature journal article supplement (doi:10.1186/s12967-021-03014-x), 2021-08-17

A

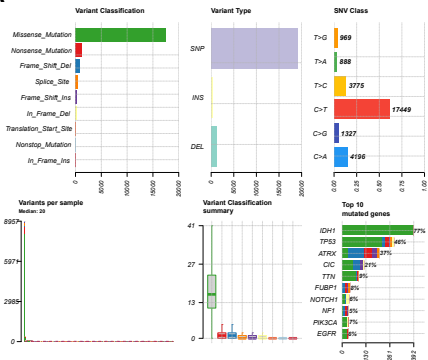

B

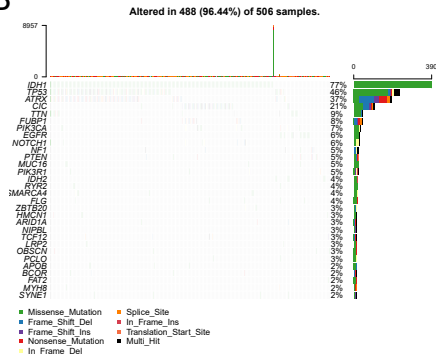

C

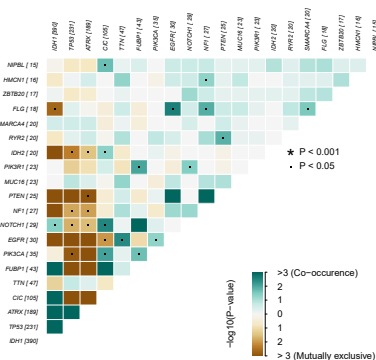

Supplement: MOESM1 [file 19577212]
